# Supplementary material for: Intranasal and oral vaccination with protein-based antigens: advantages, challenges and formulation strategies
Source: PubMed Central journal article supplement (PMC4491048; doi:10.1007/s13238-015-0164-2), 2015-05-06
Supplement: 13238_2015_164_MOESM1_ESM.pdf [file 13238_2015_164_MOESM1_ESM.pdf]

**Supplementary table 1. List of promising adjuvants tested for intranasal and oral vaccination with protein antigens**

| Adjuvants                                      | Administration<br>/Animals   | Protein antigens  | Reported responses       | References                                                           |
|------------------------------------------------|------------------------------|-------------------|--------------------------|----------------------------------------------------------------------|
| <b>Alum</b>                                    |                              |                   |                          |                                                                      |
| Alum                                           | Oral/rabbits,<br>monkeys     | DT, TT            | IgG1,Th2                 | Mirchamsy et al. 1996                                                |
| <b>Bacterial toxins and their derivatives</b>  |                              |                   |                          |                                                                      |
| Cholera toxin                                  | Nasal/mice                   | SeM               | IgG, IgA, Th1, Th2       | Florindo et al. 2009                                                 |
|                                                |                              | M2e-HBc(VLP)      | IgG, Th1, protection     | De Filette et al. 2006                                               |
|                                                |                              | rUre              | IgG, IgA, Th1, Th2       | Moschos et al. 2004                                                  |
|                                                |                              | HA                | N.A                      | Ichinoe et al. 2005                                                  |
| Heat-labile<br>enterotoxin                     | Nasal/mice,<br>rabbits, pigs | HA                | IgG, IgA                 | Singh et al. 2001                                                    |
|                                                | Nasal/rabbits                | HagB              | IgG, IgA,                | Zhang et al. 2003                                                    |
| <b>Bacterial glycolipids</b>                   |                              |                   |                          |                                                                      |
| MPL/LPS                                        | Oral, nasal/mice             | OVA               | IgG, IgA, Th1, Th2       | Sarti et al. 2001,<br>Bal et al. 2012                                |
| <b>Bacterial peptidoglycan</b>                 |                              |                   |                          |                                                                      |
| MDP                                            | Nasal/mice                   | OVA               | IgG1, IgA                | Bal et al. 2012                                                      |
| <b>Bacterial second messengers</b>             |                              |                   |                          |                                                                      |
| c-di-AMP                                       | Nasal/mice                   | $\beta$ -Gal, OVA | IgG, IgA, Th1/2/17, CTL  | Ebensen et al. 2011                                                  |
|                                                |                              | rNP               | IgG, IgA, Th1            | Sanchez et al. 2014                                                  |
| c-di-IMP                                       | Nasal/mice                   | $\beta$ -Gal, OVA | IgG, IgA, Th1/2/17, CTL  | Libanova et al. 2010                                                 |
| c-di-GMP                                       | Nasal/mice                   | $\beta$ -Gal, OVA | IgG, IgA, Th1, CTL       | Ebensen et al. 2007                                                  |
|                                                |                              | HA                | IgG, IgA, Th1, Th2       | Svindland et al. 2013                                                |
|                                                | Nasal,<br>sublingual/mice    | H5N1 virosomes    | IgG, IgA, Th1, Th2, Th17 | Pedersen et al. 2011                                                 |
| <b>Synthetic bacterial DNA and viral dsRNA</b> |                              |                   |                          |                                                                      |
| CpG                                            | Nasal/mice                   | HBsAg             | IgG, IgA, Th1, Th2, CTLs | McCluskie et al. 1998,                                               |
|                                                | Nasal/mice                   | HIV peptides      | IgG, IgA                 | Pun et al. 2009, Buffa et al.<br>2012                                |
|                                                | Oral/mice, rats              | HBsAg, TT         | IgG, IgA, Th1, Th2, CTLs | McCluskie et al. 2000,<br>Eastcott et al. 2001, Buffa<br>et al. 2012 |
| Poly I:C                                       | Nasal/mice;                  | SHIV-VLP          | IgG, IgA, CTL            | Kang et al. 2004                                                     |
|                                                |                              | HA                | IgG, IgA, protection     | Ichinoe et al. 2005                                                  |
|                                                | Nasal/mice                   | HPIV-HN           | IgG, IgA                 | Senchi et al. 2013                                                   |
| <b>Virosomes</b>                               |                              |                   |                          |                                                                      |
| Virosomes                                      | Nasal/mice                   | SHIV-VLP          | IgG, IgA, CTL            | Kang et al. 2004                                                     |
| <b>Synthetic small organic molecules</b>       |                              |                   |                          |                                                                      |
| Imidazoquinoline                               | Nasal/mice                   | HBsAg             | IgG, Th1, Th2            | Vicente et al. 2013                                                  |
| C48/80                                         | Nasal/rabbits                | BoNT/A-Hcbtre     | IgG                      | Staats et al. 2011                                                   |

---

|                                                                     |                       |                       |                                |                                 |
|---------------------------------------------------------------------|-----------------------|-----------------------|--------------------------------|---------------------------------|
|                                                                     | Nasal/mice            | HA                    | IgG, IgA, Th1, Th2, protection | Meng et al. 2011                |
| Vitamin E TPGS,                                                     | Nasal/mice            | DT                    | IgG                            | Somavarapu et al. 2005          |
| $\alpha$ -GalCer                                                    | Nasal, oral<br>/mice; | HIV-gp120<br>epitopes | Cellular                       | Courtney et al. 2009            |
| <b>Plant derived molecules</b>                                      |                       |                       |                                |                                 |
| Saponin                                                             | Nasal/mice            | HagB                  | IgG, IgA, Th1, CTLs            | Zhang et al. 2003               |
|                                                                     | Nasal/rabbits         | TT                    | IgA, IgG                       | Moghadam et al. 2012            |
| Eurocine                                                            | Nasal/mice            | HA                    | IgG, IgA, protection           | Petersson et al. 2010           |
| <b>Polymers from crustaceans' shell or particles from surf clam</b> |                       |                       |                                |                                 |
| Chitosan                                                            | Nasal/mice            | M1                    | IgG, IgA, protection           | Sui et al. 2010                 |
|                                                                     |                       | rUre                  | IgG, IgA, Th1, Th2, cellular   | Moschos et al. 2004             |
|                                                                     |                       | HA                    | IgG, IgA, Th1, Th2             | Svindland et al. 2013           |
| Surf clam<br>microparticles                                         | Nasal/mice            | HA                    | IgG, IgA                       | Ichinohe et al. 2006            |
| <b>Cytokines</b>                                                    |                       |                       |                                |                                 |
| IL-1                                                                | Nasal/mice            | HA                    | IgG, IgA, protection           | Kayamuro et al. 2010            |
| IL-12                                                               | Nasal/mice            | TT                    | IgG, IgA, Th1, Th2             | Boyaka et al. 1999              |
| TNF and mutants                                                     | Nasal/mice            | OVA                   | IgG, IgA, Th2                  | Kayamuro et al. 2009a,<br>2009b |

---

**Supplementary table 2. List of materials and delivery vehicles tested for intranasal and oral vaccination with protein antigens**

| Materials                 | Administration/Animals            | Protein antigens | Reported responses             | Delivery vehicles* and adjuvant if applicable | References                                                |                                                            |
|---------------------------|-----------------------------------|------------------|--------------------------------|-----------------------------------------------|-----------------------------------------------------------|------------------------------------------------------------|
| <b>VLP</b>                |                                   |                  |                                |                                               |                                                           |                                                            |
| VLP-HBV                   | Nasal/mice                        | M2e              | IgG, Th1, protection           | NPs, CT                                       | De Filette et al. 2006                                    |                                                            |
| VLP-HEV                   | Oral/mice                         | HEV              | IgG, IgA                       | NPs                                           | Li et al. 2001, Wu et al. 2012                            |                                                            |
| VLP-MuPyV                 | Nasal/mice                        | GAS-J8i peptide  | IgG, IgA                       | NPs                                           | Rivera-Hernandez et al. 2013                              |                                                            |
| VLP-NV                    | Oral, nasal/mice                  | rNV-VLP          | IgG, IgA                       | NPs, LT/CT                                    | Mason et al. 1996, Ball et al. 1998, Guerrero et al. 2001 |                                                            |
| <b>Synthetic polymers</b> |                                   |                  |                                |                                               |                                                           |                                                            |
| PLGA                      | Nasal, oral/mice, rabbits, cattle | F1/V             | IgG, IgA                       | MPs/MSs                                       | Jaganathan et al. 2006                                    |                                                            |
|                           |                                   | Oral/mice        | OVA                            | IgG, IgA                                      | NPs, MPLA                                                 | Sarti et al. 2011                                          |
|                           |                                   |                  | OVA                            | IgA, CTL                                      | MPs                                                       | Maloy et al. 1994                                          |
|                           | Nasal, oral/rabbits               | Malaria-SPf6 6   | IgG, Th1                       | MPs                                           | Carcaboso et al. 2003                                     |                                                            |
|                           |                                   | SFV-Env E2       | Ig, protection                 | MSs                                           | Brandhonneur et al. 2009                                  |                                                            |
|                           |                                   | Nasal/mice       | HBsAg                          | IgA, cellular                                 | CS-PLGA MSs, CTB                                          | Jaganathan et al. 2006                                     |
|                           |                                   |                  | BRSV-peptides                  | IgA, cellular                                 | MPs                                                       | Kavanagh et al. 2013                                       |
|                           | Nasal/calves                      | BP13V-peptides   | IgG                            | NPs                                           | Mansoor et al. 2014                                       |                                                            |
|                           |                                   | OVA              | IgG, IgA                       | MSs/MPs                                       | Kavanaagh et al. 2003                                     |                                                            |
|                           |                                   | Nasal/mice       | F1/V/(F1+V)                    | IgG, IgA                                      | MSs                                                       | Eyles et al. 2000, Alpar et al. 2001, Tripathi et al. 2006 |
| Nasal/rats                | TT                                |                  | IgG, IgA                       | PEG-PLA NPs/MPs                               | Tobio et al. 1998, Vila et al. 2004                       |                                                            |
| PCL                       | Oral/mice                         | HBsAg            | IgG, IgA, Th1                  | PEG-PLA-PEG NPs                               | Jain et al. 2010                                          |                                                            |
|                           | Oral/mice                         | OVA              | IgG                            | RGD peptide, NPs of PLGA/PLGA-PEG/PCL-PEG     | Garinot et al. 2007                                       |                                                            |
|                           |                                   | Nasal/mice       | DT                             | IgG                                           | NPs, VE-TPGS                                              | Somavarapu et al. 2005, Singh et al. 2006                  |
|                           |                                   |                  | SeM                            | IgG, IgA, Th1, Th2                            | NSs, CTB                                                  | Florindo et al. 2009                                       |
| PEI                       | Nasal/mice, rabbits               | HA, HSV-gpD,     | IgG, IgA, cellular, protection | Nanoscale complexes                           | Wegmann et al. 2012                                       |                                                            |

|                             |                              |                   |                                                |                                 |  |                                    |  |
|-----------------------------|------------------------------|-------------------|------------------------------------------------|---------------------------------|--|------------------------------------|--|
|                             |                              | HIV-gp140         |                                                |                                 |  |                                    |  |
| Eudragits                   | Oral/mice                    | HIV Env epitopes  | Colon-targeted, IgG, IgA, cellular, protection | NPs/MPs, TLR ligands            |  | Zhu et al. 2012                    |  |
|                             | Oral/human                   | Bee venom peptide | Colon-targeted                                 | Alginate-liposome               |  | Liu et al. 2003                    |  |
| <b>Natural polymers</b>     |                              |                   |                                                |                                 |  |                                    |  |
| Chitosan                    | Nasal/mice                   | TT                | IgG, Th1, Th2                                  | NPs                             |  | Sayin et al. 2009                  |  |
|                             |                              | HBsAg             | IgG, Th1, Th2                                  | Nanocapsules, Imiquimod         |  | Vicente et al. 2013                |  |
| Alginate                    | Nasal, oral/mice             | HBsAg             | IgG, IgA, cellular                             | Alginate-chitosan NPs, CpG      |  | Borges et al. 2007,2008            |  |
|                             | Nasal/calves                 | PSA               | IgG                                            | MPs                             |  | Rebelatto et al. 2001              |  |
|                             | Oral/mice                    | BSA               | IgG, Th1, Th2                                  | Lectin-alginate NPs             |  | Malik et al. 2012                  |  |
| Starch                      | Oral/mice                    | DT and its mutant | IgG, IgA, Th1, Th2                             | Polyacryl starch MPs            |  | Rydell et al. 2004                 |  |
|                             |                              | HSA               | IgG, IgA, Th1, Th2                             | Polyacryl starch MPs            |  | Wikingsson et al. 2002             |  |
|                             | Nasal, oral/mice             | HSA               | IgG, IgA, Th2                                  | Silicone-starch MPs             |  | McDermott et al. 1998              |  |
| Dextran                     | Nasal/rabbit                 | TT                | IgG, IgA                                       | MSs                             |  | Sajadi et al. 2008                 |  |
| Hyaluronic acid             | Nasal/mice, rabbits, pigs    | HA                | IgG, IgA                                       | HYAFF MSs, LT                   |  | Singh et al. 2001                  |  |
| Γ-PGA                       | Nasal/mice                   | OVA               | IgG, IgA, Th1, CTL                             | NPs                             |  | Matsuo et al. 2011                 |  |
|                             |                              |                   |                                                |                                 |  | Noh et al. 2013                    |  |
| <b>Lipid based polymers</b> |                              |                   |                                                |                                 |  |                                    |  |
| Liposome                    | Oral/mice                    | BSA               | IgG, IgA                                       | UEA1-liposome                   |  | Li et al. 2011a, 2011b             |  |
|                             |                              | OVA               | IgG, IgA                                       | PEG-liposome                    |  | Minato et al. 2003                 |  |
|                             | Nasal/mice                   | HBsAg             | IgG, IgA, Th1                                  | IgG-liposome                    |  | Tiwari et al. 2011a                |  |
|                             |                              |                   | IgG, IgA, Th1                                  | HA-liposome                     |  | Tiwari et al. 2011b                |  |
|                             |                              | OVA               | IgG, IgA                                       | Oligomannose-liposome           |  | Ishii et al. 2010                  |  |
|                             |                              | HPIV-HN           | IgG, IgA                                       | Oligomannose-liposome, Poly I:C |  | Senchi et al. 2013                 |  |
|                             | Oral/rabbits, monkeys, human | DT and TT         | IgG                                            | LRS                             |  | Mirchamsy et al. 1996              |  |
| Niosome                     | Nasal/mice                   | HSV-gBs           | IgG, Th1, Th2                                  | N.A.                            |  | Cortesi et al. 2013                |  |
| Bilosome                    | Oral/mice                    | HA                | IgG, Th1, Th2                                  | N.A.                            |  | Mann et al. 2009                   |  |
|                             |                              | HBsAg             | IgG, IgA                                       | CTB-bilosome                    |  | Shukla et al. 2008, 2010           |  |
|                             |                              | TT                | IgG, IgA, Th1                                  | N.A.                            |  | Mann et al. 2006, Jain et al. 2014 |  |
|                             |                              | DT                | IgG, IgA                                       | N.A.                            |  | Shukla et al. 2011                 |  |
| Virosome                    | Nasal/sublingual             | HA                | IgG, IgA, Th1, Th2, Th17                       | c-di-GMP                        |  | Pedersen et al. 2011               |  |
| ISCOMs                      | Nasal/mice                   | RSV Env           | IgG, IgA, Th1, Th2                             | N.A.                            |  | Hu et al. 1998                     |  |
|                             |                              | MmmSC             | IgG, IgA, Th1, Th2, CTL                        | N.A.                            |  | Abusugra et al. 1999               |  |
|                             |                              | HBsAg             | IgG, IgA, Th1, Th2, CTL                        | N.A.                            |  | Pandey et al. 2010                 |  |

|                                                                       |            |             |                            |                    |                         |
|-----------------------------------------------------------------------|------------|-------------|----------------------------|--------------------|-------------------------|
| Archaeosome                                                           | Nasal/mice | OVA         | IgG, IgA, Th1, Th2,<br>CTL | AMVAD              | Patel et al. 2007, 2008 |
| <b>Multiple antigen-presenting systems-synthetic peptides</b>         |            |             |                            |                    |                         |
| MAP                                                                   |            | MAP-F1      | IgG, IgA, Th1, Th2         | PLGA MPs, CpG      | Ali et al. 2013         |
| <b>Hydrogel of cationic cholesteryl group-bearing pullulan (cCHP)</b> |            |             |                            |                    |                         |
| cCHP                                                                  | Nasal/mice | BoHc/A, TT  | IgG, IgA,                  | Nanogel            | Nochi et al. 2010       |
|                                                                       |            | PspA        | IgG, IgA, Th2, Th17        | Nanogel            | Kong et al. 2013        |
| <b>Inorganic particles</b>                                            |            |             |                            |                    |                         |
| Gold                                                                  | Oral/mice  | TT          | IgG, IgA                   | CS-AuNPs, QS       | Barhate et al. 2013     |
|                                                                       | Nasal/mice | M2e         | IgG, Th1, Th2              | M2e-AuNP, CpG      | Tao et al. 2014         |
| <b>Receptor-ligand mediated target delivery</b>                       |            |             |                            |                    |                         |
| UEA-1                                                                 | Oral/mice  | HBsAg       | IgG, IgA, Th1, Th2         | UEA1-PLGA NPs      | Gupta et al. 2007       |
|                                                                       |            | BSA         | IgG, IgA                   | UEA-liposome       | Li et al. 2011a, 2011b  |
| RGD peptide                                                           | Oral/mice  | OVA         | IgG                        | PEG-PLGA NPs       | Garinot et al. 2007     |
| Ganglioside                                                           | Oral/mice  | EGFP        | IgG, IgA, Th2              | N.A.               | Kim et al. 2006         |
| <b>GM1 ligand</b>                                                     |            |             |                            |                    |                         |
| Co1                                                                   | Oral/mice  | EGFP        | IgG, IgA, Th2              | N.A.               | Kim et al. 2010         |
| Fc                                                                    | Nasal/mice | MERS-RBD    | IgG, IgA, Th1, Th2         | Fc-RBD, poly I:C   | Ma et al. 2014a         |
| Mannose                                                               | Nasal/mice | OVA         | IgG, IgA                   | Liposome           | Ishii et al. 2010       |
|                                                                       |            | HPIV-HN     | IgG, IgA                   | Liposome, poly I:C | Senchi et al. 2013      |
| IgG                                                                   | Nasal/mice | HBsAg       | IgG, IgA, Th1              | IgG-liposome       | Tiwari et al. 2011a     |
| Transferrin                                                           | Nasal/mice | HIV-1 gp140 | IgG, IgA                   | Tf-gp140           | Mann et al. 2012        |
| Claudin-4                                                             | Nasal/mice | OVA         | IgG, IgA, Th1, Th2         | OVA-ligands        | Nagase et al. 2013      |

\*: MPs: microparticles; NPs: nanoparticles; MSs: Microspheres; NSs: Nanospheres.
